# Supplementary material for: Aerobic and Muscle-Strengthening Physical Activity, Television Viewing, and Nonalcoholic Fatty Liver Disease: The CARDIA Study
Source: MDPI journal article supplement (doi:10.3390/jcm12175603), 2023-08-28
Supplement: s1 [file s1]

## Supplemental Content

McDonough DJ, Mathew M, Pope ZC, et al. Aerobic and muscle-strengthening physical activity, television viewing, and nonalcoholic fatty liver disease: the CARDIA study.

**Table S1.** STROBE statement — checklist for reports of cross-sectional studies.

**Table S2.** Baseline characteristics among year 25 CARDIA participants, overall and by moderate-to-severe NAFLD category.

**Table S3.** Sensitivity analysis of the adjusted risk of moderate-to-severe steatosis (NAFLD  $\leq 40$  Hounsfield Units) per interquartile range of continuous physical activity and television viewing (hours per week).

**Table S1. STROBE statement — checklist for reports of cross-sectional studies.**

| Table S1. STROBE statement: checklist for Reports of cross-sectional studies. |         |                                                                                                                                                                                                   | Page No |
|-------------------------------------------------------------------------------|---------|---------------------------------------------------------------------------------------------------------------------------------------------------------------------------------------------------|---------|
|                                                                               | Item No | Recommendation                                                                                                                                                                                    |         |
| Title and abstract                                                            | 1       | (a) Indicate the study’s design with a commonly used term in the title or the abstract                                                                                                            | 3-4     |
|                                                                               |         | (b) Provide in the abstract an informative and balanced summary of what was done and what was found                                                                                               | 3-4     |
| Introduction                                                                  |         |                                                                                                                                                                                                   |         |
| Background/rationale                                                          | 2       | Explain the scientific background and rationale for the investigation being reported                                                                                                              | 5-6     |
| Objectives                                                                    | 3       | State specific objectives, including any prespecified hypotheses                                                                                                                                  | 5-6     |
| Methods                                                                       |         |                                                                                                                                                                                                   |         |
| Study design                                                                  | 4       | Present key elements of study design early in the paper                                                                                                                                           | 7       |
| Setting                                                                       | 5       | Describe the setting, locations, and relevant dates, including periods of recruitment, exposure, follow-up, and data collection                                                                   | 7       |
| Participants                                                                  | 6       | (a) Give the eligibility criteria, and the sources and methods of selection of participants                                                                                                       | 7       |
| Variables                                                                     | 7       | Clearly define all outcomes, exposures, predictors, potential confounders, and effect modifiers. Give diagnostic criteria, if applicable                                                          | 8-10    |
| Data sources/ measurement                                                     | 8       | For each variable of interest, give sources of data and details of methods of assessment (measurement). Describe comparability of assessment methods if there is more than one group              | 8-10    |
| Bias                                                                          | 9       | Describe any efforts to address potential sources of bias                                                                                                                                         | 7-10    |
| Study size                                                                    | 10      | Explain how the study size was arrived at                                                                                                                                                         | 7       |
| Quantitative variables                                                        | 11      | Explain how quantitative variables were handled in the analyses. If applicable, describe which groupings were chosen and why                                                                      | 7-10    |
| Statistical methods                                                           | 12      | (a) Describe all statistical methods, including those used to control for confounding                                                                                                             | 10      |
|                                                                               |         | (b) Describe any methods used to examine subgroups and interactions                                                                                                                               | 10      |
|                                                                               |         | (c) Explain how missing data were addressed                                                                                                                                                       | 10      |
|                                                                               |         | (d) If applicable, describe analytical methods taking account of sampling strategy                                                                                                                | N/A     |
|                                                                               |         | (e) Describe any sensitivity analyses                                                                                                                                                             | 10      |
| Results                                                                       |         |                                                                                                                                                                                                   |         |
| Participants                                                                  | 13      | (a) Report numbers of individuals at each stage of study—eg numbers potentially eligible, examined for eligibility, confirmed eligible, included in the study, completing follow-up, and analysed | 11      |
|                                                                               |         | (b) Give reasons for non-participation at each stage                                                                                                                                              | 11      |
|                                                                               |         | (c) Consider use of a flow diagram                                                                                                                                                                | Fig.1   |
| Descriptive data                                                              | 14      | (a) Give characteristics of study participants (eg demographic, clinical, social) and information on exposures and potential confounders                                                          | 11      |
|                                                                               |         | (b) Indicate number of participants with missing data for each variable of interest                                                                                                               | 11      |
|                                                                               | Item No | Recommendation                                                                                                                                                                                    | Page No |
| Outcome data                                                                  | 15      | Report numbers of outcome events or summary measures                                                                                                                                              | 11      |

|                          |    |                                                                                                                                                                                                              |       |
|--------------------------|----|--------------------------------------------------------------------------------------------------------------------------------------------------------------------------------------------------------------|-------|
| Main results             | 16 | (a) Give unadjusted estimates and, if applicable, confounder-adjusted estimates and their precision (eg, 95% confidence interval). Make clear which confounders were adjusted for and why they were included | 11-12 |
|                          |    | (b) Report category boundaries when continuous variables were categorized                                                                                                                                    | 11-12 |
|                          |    | (c) If relevant, consider translating estimates of relative risk into absolute risk for a meaningful time period                                                                                             | N/A   |
| Other analyses           | 17 | Report other analyses done—eg analyses of subgroups and interactions, and sensitivity analyses                                                                                                               | 11-12 |
| <b>Discussion</b>        |    |                                                                                                                                                                                                              |       |
| Key results              | 18 | Summarise key results with reference to study objectives                                                                                                                                                     | 13    |
| Limitations              | 19 | Discuss limitations of the study, taking into account sources of potential bias or imprecision. Discuss both direction and magnitude of any potential bias                                                   | 16    |
| Interpretation           | 20 | Give a cautious overall interpretation of results considering objectives, limitations, multiplicity of analyses, results from similar studies, and other relevant evidence                                   | 13-16 |
| Generalisability         | 21 | Discuss the generalisability (external validity) of the study results                                                                                                                                        | 17    |
| <b>Other information</b> |    |                                                                                                                                                                                                              |       |
| Funding                  | 22 | Give the source of funding and the role of the funders for the present study and, if applicable, for the original study on which the present article is based                                                | 16-17 |

**Table S2. Baseline characteristics among year 25 CARDIA participants, overall and by moderate-to-severe NAFLD category.**

| Variable                             | Overall<br>(n = 2726) | Liver Attenuation                                |                                  |
|--------------------------------------|-----------------------|--------------------------------------------------|----------------------------------|
|                                      |                       | Moderate-to-<br>Severe NAFLD<br>≤40 HU (n = 262) | No NAFLD<br>>40 HU<br>(n = 2464) |
| Liver Attenuation (HU), mean ± SD    | 55.6 ± 11.6           | 29.2 ± 9.9                                       | 58.5 ± 7.5                       |
| Age (years), mean ± SD               | 50.1 ± 3.6            | 50.5 ± 3.7                                       | 50.0 ± 3.6                       |
| Sex, n (%)                           |                       |                                                  |                                  |
| <i>Male</i>                          | 1163 (42.7)           | 144 (55.2)                                       | 1019 (41.4)                      |
| <i>Female</i>                        | 1562 (57.3)           | 117 (44.8)                                       | 1445 (58.6)                      |
| Race n (%)                           |                       |                                                  |                                  |
| <i>Black</i>                         | 1325 (48.6)           | 113 (43.1)                                       | 1212 (49.2)                      |
| <i>White</i>                         | 1401 (51.4)           | 149 (56.9)                                       | 1252 (50.8)                      |
| Education (years), mean ± SD         | 15.1 ± 2.6            | 15.0 ± 2.7                                       | 14.9 ± 2.6                       |
| Diet Quality Score (std.), mean ± SD | 5.4 ± 1.0             | 5.4 ± 1.0                                        | 5.3 ± 0.9                        |
| Smoking, n (%)                       |                       |                                                  |                                  |
| <i>Never</i>                         | 1717 (63.0)           | 157 (59.9)                                       | 1560 (63.3)                      |
| <i>Former</i>                        | 590 (21.6)            | 70 (26.7)                                        | 520 (21.1)                       |
| <i>Current</i>                       | 419 (15.4)            | 35 (13.4)                                        | 384 (15.6)                       |
| Alcohol (drinks/week), mean ± SD     | 7.4 ± 10.7            | 7.3 ± 11.3                                       | 7.4 ± 10.7                       |
| BMI (kg/m <sup>2</sup> ), mean ± SD  | 30.4 ± 7.2            | 36.3 ± 7.4                                       | 29.8 ± 6.8                       |
| Waist Circumference (cm), mean ± SD  | 94.7 ± 15.8           | 112.1 ± 14.8                                     | 92.8 ± 14.8                      |

Note. We excluded participants who were heavy drinkers (i.e., those who consumed ≥14 drinks/week) along with other factors related to liver disease (see Figure 1 in the main text). Abbreviations: SD, standard deviation; NAFLD, nonalcoholic fatty liver disease; HU, Hounsfield Units; std., standardized score; BMI, body mass index.

**Table S3. Sensitivity analysis of the adjusted risk of moderate-to-severe steatosis (NAFLD  $\leq 40$  Hounsfield Units) per interquartile range of continuous physical activity and television viewing (hours per week).**

| Variable                                               | Model 1          | Model 2          | Model 3          | Model 3b         |
|--------------------------------------------------------|------------------|------------------|------------------|------------------|
| <b>Aerobic PA</b>                                      |                  |                  |                  |                  |
| <i>Moderate</i><br>(IQR = 4.33, hrs/wk)                | 1.04 (0.85-1.27) | 1.08 (0.88-1.33) | 1.14 (0.93-1.42) | 1.17 (0.95-1.44) |
| <i>Vigorous</i><br>(IQR = 1.91, hrs/wk)                | 0.63 (0.51-0.78) | 0.65 (0.52-0.81) | 0.78 (0.63-0.97) | 0.88 (0.71-1.09) |
| <b>Muscle-Strengthening PA</b><br>(IQR = 3.33, hrs/wk) | 1.00 (0.83-1.20) | 1.01 (0.84-1.21) | 1.06 (0.88-1.28) | 1.09 (0.90-1.32) |
| <b>Television Viewing</b><br>(IQR = 14.0, hrs/wk)      | 1.10 (1.00-1.21) | 1.12 (1.02-1.24) | 1.06 (1.01-1.18) | 1.06 (0.94-1.19) |

Note. Data displayed as risk ratios and 95% confidence intervals. All physical activity and television viewing variables are included simultaneously in all models. Model 1, adjusted for age, race, sex, study center; Model 2 additionally adjusted for diet quality, alcohol consumption, education, and smoking status; Model 3 additionally adjusted for body mass index (BMI); Model 3b additionally adjusted for waist circumference rather than BMI. Abbreviations: hrs/wk, hours per week; PA, physical activity. Abbreviations: hrs/wk, hours per week; PA, physical activity; IQR, interquartile range.
